# Supplementary material
Source: HighWire-hosted journal article supplement (https://bmjopen.bmj.com/content/11/9/e049505)
Supplement: inline-supplementary-material-7 [file inline-supplementary-material-7.pdf]

## Appendix 2: Search strategies for each of the five databases (Initially searched for the period 01.01.2002 - 28.08.2020, updated to include 12.05.2021)

### Databases searched

- MEDLINE ALL 2002 to May 11, 2021
  - o Ovid MEDLINE, PubMed (only 28.08.2020);
  - o Ovid MEDLINE(R) and Epub Ahead of Print, In-Process & Other Non-Indexed Citations and Daily 2002 to August 27, 2020
- Embase 2002 to 2021, Ovid
- Web of Science Core Collection, Clarivate Analytics
- Global Index Medicus, WHO
- COVID-19 Evidence, Epistemonikos Foundation

### Updated search 12.05.2021

We searched:

- **PubMed, US National Library of Medicine (NLM):** [pubmed.ncbi.nlm.nih.gov/](http://pubmed.ncbi.nlm.nih.gov/)  
Only 28.08.2020 as string was not available in 2021.
- **MEDLINE ALL 1946 to May 11, 2021, Ovid (searched 12.05.2021)**

| #  | Searches                                                                                                                                          | Results |
|----|---------------------------------------------------------------------------------------------------------------------------------------------------|---------|
| 1  | COVID-19 Vaccines/                                                                                                                                | 2510    |
| 2  | Coronavirus/                                                                                                                                      | 4692    |
| 3  | Betacoronavirus/                                                                                                                                  | 33218   |
| 4  | Coronavirus Infections/                                                                                                                           | 44847   |
| 5  | Coronaviridae Infections/                                                                                                                         | 919     |
| 6  | Severe Acute Respiratory Syndrome/                                                                                                                | 5545    |
| 7  | Pandemics/                                                                                                                                        | 56289   |
| 8  | (COVID-19 or COVID 19 or COVID19 or 2019-nCoV or SARS2 or SARS-CoV or SARS-CoV-2 or SARS-Cov-19 or coronavirus* or corona or pandemic?).ti,ab,kf. | 177584  |
| 9  | (BNT162 or BNT-162 or mRNA-1273 or mRNA1273 or INO-4800 or INO4800 or ChAdOx1 or Ad5-nCoV).ti,ab,kf,hw.                                           | 218     |
| 10 | or/2-9                                                                                                                                            | 184722  |
| 11 | Vaccines/                                                                                                                                         | 22577   |
| 12 | Viral Vaccines/                                                                                                                                   | 27055   |
| 13 | Vaccination/                                                                                                                                      | 85401   |
| 14 | Vaccination Coverage/                                                                                                                             | 1540    |
| 15 | Mass Vaccination/                                                                                                                                 | 3208    |
| 16 | Immunization/                                                                                                                                     | 51563   |
| 17 | Immunization Programs/                                                                                                                            | 11524   |
| 18 | (vaccin* or immuni*).ti,ab,kf.                                                                                                                    | 576919  |
| 19 | or/11-18                                                                                                                                          | 610926  |
| 20 | "Delivery of Health Care"/                                                                                                                        | 95912   |

|    |                                                                                                                                                                              |         |
|----|------------------------------------------------------------------------------------------------------------------------------------------------------------------------------|---------|
| 21 | "Health Services Needs and Demand"/                                                                                                                                          | 54005   |
| 22 | Resource Allocation/                                                                                                                                                         | 8895    |
| 23 | Health Care Rationing/                                                                                                                                                       | 11853   |
| 24 | Health Services Accessibility/                                                                                                                                               | 78488   |
| 25 | Health Equity/                                                                                                                                                               | 1805    |
| 26 | Right to Health/                                                                                                                                                             | 131     |
| 27 | Universal Health Care/                                                                                                                                                       | 149     |
| 28 | Healthcare Disparities/                                                                                                                                                      | 18787   |
| 29 | Socioeconomic Factors/                                                                                                                                                       | 162607  |
| 30 | Social Justice/                                                                                                                                                              | 12551   |
| 31 | Global Health/                                                                                                                                                               | 50200   |
| 32 | Human Rights/                                                                                                                                                                | 14729   |
| 33 | ((equit* or equal* or fair* or inequit* or unequal or unfair* or global*) adj3 (access* or allocat* or distribut* or deliver* or provision or supply or supplies)).ti,ab,kf. | 32465   |
| 34 | (right to health* or universal health*).ti,ab,kf.                                                                                                                            | 7779    |
| 35 | ((health* or health care) adj (rationing or disparities)).ti,ab,kf.                                                                                                          | 15193   |
| 36 | or/20-35                                                                                                                                                                     | 488375  |
| 37 | 10 and 19 and 36                                                                                                                                                             | 1157    |
| 38 | 1 and 36                                                                                                                                                                     | 280     |
| 39 | 37 or 38                                                                                                                                                                     | 1194    |
| 40 | (202008* or 202009* or 202010* or 202011* or 202012* or 2021*).dt,dp,ed,ep,yr.                                                                                               | 1805737 |
| 41 | 39 and 40                                                                                                                                                                    | 588     |
| 42 | 38 or 41                                                                                                                                                                     | 608     |

• **Embase 1974 to 2021 Week 18 (searched 12.05.2021)**

| # | Searches                                                                                                                                    | Results |
|---|---------------------------------------------------------------------------------------------------------------------------------------------|---------|
| 1 | SARS-CoV-2 vaccine/                                                                                                                         | 2292    |
| 2 | coronavirus disease 2019/                                                                                                                   | 106145  |
| 3 | coronavirinae/                                                                                                                              | 3003    |
| 4 | betacoronavirus/                                                                                                                            | 7651    |
| 5 | coronavirus infection/                                                                                                                      | 12666   |
| 6 | coronaviridae infection/                                                                                                                    | 187     |
| 7 | pandemic/                                                                                                                                   | 65235   |
| 8 | (COVID-19 or COVID 19 or COVID19 or 2019-nCoV or SARS2 or SARS-CoV or SARS-CoV-2 or SARS-Cov-19 or coronavirus* or corona or pandemic?).mp. | 195467  |

|    |                                                                                                                                                                                 |        |
|----|---------------------------------------------------------------------------------------------------------------------------------------------------------------------------------|--------|
| 9  | (BNT162 or BNT-162 or mRNA-1273 or mRNA1273 or INO-4800 or INO4800 or ChAdOx1 or Ad5-nCoV).mp.                                                                                  | 355    |
| 10 | or/3-9                                                                                                                                                                          | 195821 |
| 11 | vaccine/                                                                                                                                                                        | 63516  |
| 12 | virus vaccine/                                                                                                                                                                  | 20586  |
| 13 | severe acute respiratory syndrome vaccine/                                                                                                                                      | 453    |
| 14 | vaccination/                                                                                                                                                                    | 151179 |
| 15 | vaccination coverage/                                                                                                                                                           | 2788   |
| 16 | immunization/                                                                                                                                                                   | 98822  |
| 17 | mass immunization/                                                                                                                                                              | 3739   |
| 18 | (vaccin* or immuni*).ti,ab,kw,ot.                                                                                                                                               | 685955 |
| 19 | or/11-18                                                                                                                                                                        | 736294 |
| 20 | health care delivery/                                                                                                                                                           | 184159 |
| 21 | resource management/                                                                                                                                                            | 10987  |
| 22 | resource allocation/                                                                                                                                                            | 22438  |
| 23 | health care access/                                                                                                                                                             | 69640  |
| 24 | health care quality/                                                                                                                                                            | 250577 |
| 25 | health equity/                                                                                                                                                                  | 4605   |
| 26 | right to health/                                                                                                                                                                | 214    |
| 27 | universal health care/                                                                                                                                                          | 337    |
| 28 | health care disparity/                                                                                                                                                          | 17595  |
| 29 | socioeconomics/                                                                                                                                                                 | 147326 |
| 30 | social justice/                                                                                                                                                                 | 11121  |
| 31 | global health/                                                                                                                                                                  | 12881  |
| 32 | human rights/                                                                                                                                                                   | 26721  |
| 33 | ((equit* or equal* or fair* or inequit* or unequal or unfair* or global*) adj3 (access* or allocat* or distribut* or deliver* or provision or supply or supplies)).ti,ab,kw,ot. | 42137  |
| 34 | (right to health* or universal health*).ti,ab,kw,ot.                                                                                                                            | 9211   |
| 35 | ((health* or health care) adj (rationing or disparities)).ti,ab,kw,ot.                                                                                                          | 19032  |
| 36 | or/20-35                                                                                                                                                                        | 714178 |
| 37 | 10 and 19 and 36                                                                                                                                                                | 1372   |
| 38 | 1 and 36                                                                                                                                                                        | 266    |
| 39 | 2 and 19 and 36                                                                                                                                                                 | 692    |
| 40 | or/37-39                                                                                                                                                                        | 1423   |
| 41 | limit 40 to (conference abstracts or embase)                                                                                                                                    | 1129   |
| 42 | limit 37 to (conference abstracts or embase)                                                                                                                                    | 1078   |

|    |                                                                          |         |
|----|--------------------------------------------------------------------------|---------|
| 43 | (202008* or 202009* or 202010* or 202011* or 202012* or 2021*).dd,em,yr. | 1850404 |
| 44 | 42 and 43                                                                | 439     |
| 45 | limit 38 to (conference abstracts or embase)                             | 259     |
| 46 | limit 39 to (conference abstracts or embase)                             | 652     |
| 47 | 44 or 45 or 46                                                           | 751     |
| 48 | 47 use oemez                                                             | 751     |

- **Web of Science, Clarivate Analytics** (searched [12.05.2021](#))

Advanced search - Topic

COVID-19 OR "COVID 19" OR COVID19 OR 2019-nCoV OR "2019 nCoV" OR SARS2 OR SARS-CoV OR "SARS CoV" OR SARS-CoV-2 OR "SARS CoV 2" OR SARS-Cov-19 OR "SARS Cov 19" OR coronavirus OR corona OR pandemic OR pandemics

AND

vaccin\* OR immuni\*

AND

equity OR equitable OR equal OR equally OR inequity OR inequitable OR unequal OR unequally OR fair\* OR unfair\* OR "right to health" OR "right to healthcare" OR "universal health" OR "universal healthcare" OR "healthcare rationing" OR "health care rationing" OR "healthcare disparity" OR "healthcare disparity" OR "healthcare disparities" OR "healthcare disparities"

- **Global Index Medicus, WHO:** [www.globalindexmedicus.net](http://www.globalindexmedicus.net) (searched [14.05.2021](#))

Advanced search in Title, abstract, subject

COVID-19 OR "COVID 19" OR COVID19 OR 2019-nCoV OR "2019 nCoV" OR SARS2 OR SARS-CoV OR "SARS CoV" OR SARS-CoV-2 OR "SARS CoV 2" OR SARS-Cov-19 OR "SARS Cov 19" OR coronavirus OR corona OR pandemic OR pandemics

AND

vaccine OR vaccines OR vaccination OR immunization OR immunisation

AND

equity OR equitable OR equal OR equally OR inequity OR inequitable OR unequal OR unequally OR fair\* OR unfair\* OR "right to health" OR "right to healthcare" OR "universal health" OR "universal healthcare" OR "healthcare rationing" OR "health care rationing" OR "healthcare disparity" OR "healthcare disparity" OR "healthcare disparities" OR "healthcare disparities" OR global OR globally

- **COVID-19 Evidence, Epistemonikos Foundation:**

[app.iloveevidence.com/loves/5e6fdb9669c00e4ac072701d?utm=epdb\\_en](http://app.iloveevidence.com/loves/5e6fdb9669c00e4ac072701d?utm=epdb_en) (searched [14.05.2021](#))

(vaccin\* OR immuniz\* OR immunis\*) AND (equity OR equitable OR equal OR equally OR inequity OR inequitable OR unequal OR unequally OR fair\* OR unfair\* OR "right to health" OR "right to healthcare" OR "universal health" OR "universal healthcare" OR "healthcare rationing" OR "health care rationing" OR "healthcare disparity" OR "healthcare disparity" OR "healthcare disparities" OR "healthcare disparities" OR global OR globally) AND (access\* or allocat\* or distribut\* or deliver\* or provision or supply or supplies)  
 LIMITED TO Type of publication: Pre-print

### Original search of databases: 28.08.2020

- **MEDLINE, PubMed** (searched 28.08.2020)

MeSH: "COVID-19 vaccine" [Supplementary Concept]

#### **Ovid MEDLINE(R) and Epub Ahead of Print, In-Process & Other Non-Indexed Citations and Daily 1946 to August 27, 2020** (searched 28.08.2020)

| #  | Searches                                                                                                                                          | Results |
|----|---------------------------------------------------------------------------------------------------------------------------------------------------|---------|
| 1  | Coronavirus/                                                                                                                                      | 3244    |
| 2  | Betacoronavirus/                                                                                                                                  | 16530   |
| 3  | Coronavirus Infections/                                                                                                                           | 24138   |
| 4  | Coronaviridae Infections/                                                                                                                         | 906     |
| 5  | Severe Acute Respiratory Syndrome/                                                                                                                | 4873    |
| 6  | Pandemics/                                                                                                                                        | 24349   |
| 7  | (COVID-19 or COVID 19 or COVID19 or 2019-nCoV or SARS2 or SARS-CoV or SARS-CoV-2 or SARS-Cov-19 or coronavirus* or corona or pandemic?).ti,ab,kf. | 91205   |
| 8  | (BNT162 or BNT-162 or mRNA-1273 or mRNA1273 or INO-4800 or INO4800 or ChAdOx1 or Ad5-nCoV).ti,ab,kf,hw.                                           | 51      |
| 9  | or/1-8                                                                                                                                            | 97109   |
| 10 | Vaccines/                                                                                                                                         | 21690   |
| 11 | Viral Vaccines/                                                                                                                                   | 25884   |
| 12 | Vaccination/                                                                                                                                      | 81687   |
| 13 | Vaccination Coverage/                                                                                                                             | 1160    |
| 14 | Mass Vaccination/                                                                                                                                 | 3038    |
| 15 | Immunization/                                                                                                                                     | 50752   |
| 16 | Immunization Programs/                                                                                                                            | 10877   |
| 17 | (vaccin* or immuni*).ti,ab,kf.                                                                                                                    | 546309  |
| 18 | or/10-17                                                                                                                                          | 579947  |
| 19 | "Delivery of Health Care"/                                                                                                                        | 91173   |
| 20 | "Health Services Needs and Demand"/                                                                                                               | 53044   |
| 21 | Resource Allocation/                                                                                                                              | 8501    |
| 22 | Health Care Rationing/                                                                                                                            | 11514   |
| 23 | Health Services Accessibility/                                                                                                                    | 74764   |
| 24 | Health Equity/                                                                                                                                    | 1291    |
| 25 | Right to Health/                                                                                                                                  | 75      |
| 26 | Universal Health Care/                                                                                                                            | 80      |
| 27 | Healthcare Disparities/                                                                                                                           | 17030   |
| 28 | Socioeconomic Factors/                                                                                                                            | 157123  |
| 29 | Social Justice/                                                                                                                                   | 12160   |
| 30 | Global Health/                                                                                                                                    | 47402   |
| 31 | Human Rights/                                                                                                                                     | 14384   |

|    |                                                                                                                                                                              |        |
|----|------------------------------------------------------------------------------------------------------------------------------------------------------------------------------|--------|
| 32 | ((equit* or equal* or fair* or inequit* or unequal or unfair* or global*) adj3 (access* or allocat* or distribut* or deliver* or provision or supply or supplies)).ti,ab,kf. | 29976  |
| 33 | (right to health* or universal health*).ti,ab,kf.                                                                                                                            | 7053   |
| 34 | ((health* or health care) adj (rationing or disparities)).ti,ab,kf.                                                                                                          | 13345  |
| 35 | or/19-34                                                                                                                                                                     | 466021 |
| 36 | 9 and 18 and 35                                                                                                                                                              | 632    |

• **Embase 1974 to 2020 Week 34, Ovid (searched 28.08.2020)**

| #  | Searches                                                                                                                                                                        | Results |
|----|---------------------------------------------------------------------------------------------------------------------------------------------------------------------------------|---------|
| 1  | coronavirinae/                                                                                                                                                                  | 2268    |
| 2  | betacoronavirus/                                                                                                                                                                | 4632    |
| 3  | coronavirus infection/                                                                                                                                                          | 8485    |
| 4  | coronaviridae infection/                                                                                                                                                        | 166     |
| 5  | pandemic/                                                                                                                                                                       | 30028   |
| 6  | (COVID-19 or COVID 19 or COVID19 or 2019-nCoV or SARS2 or SARS-CoV or SARS-CoV-2 or SARS-Cov-19 or coronavirus* or corona or pandemic?).mp.                                     | 103695  |
| 7  | (BNT162 or BNT-162 or mRNA-1273 or mRNA1273 or INO-4800 or INO4800 or ChAdOx1 or Ad5-nCoV).mp.                                                                                  | 85      |
| 8  | or/1-7                                                                                                                                                                          | 103962  |
| 9  | vaccine/                                                                                                                                                                        | 60026   |
| 10 | virus vaccine/                                                                                                                                                                  | 19609   |
| 11 | severe acute respiratory syndrome vaccine/                                                                                                                                      | 385     |
| 12 | vaccination/                                                                                                                                                                    | 140276  |
| 13 | vaccination coverage/                                                                                                                                                           | 2060    |
| 14 | immunization/                                                                                                                                                                   | 94131   |
| 15 | mass immunization/                                                                                                                                                              | 3511    |
| 16 | (vaccin* or immuni*).ti,ab,kw,ot.                                                                                                                                               | 643022  |
| 17 | or/9-16                                                                                                                                                                         | 689815  |
| 18 | health care delivery/                                                                                                                                                           | 174154  |
| 19 | resource management/                                                                                                                                                            | 10271   |
| 20 | resource allocation/                                                                                                                                                            | 20867   |
| 21 | health care access/                                                                                                                                                             | 62445   |
| 22 | health care quality/                                                                                                                                                            | 241073  |
| 23 | health equity/                                                                                                                                                                  | 3269    |
| 24 | right to health/                                                                                                                                                                | 105     |
| 25 | universal health care/                                                                                                                                                          | 155     |
| 26 | health care disparity/                                                                                                                                                          | 15646   |
| 27 | socioeconomics/                                                                                                                                                                 | 140163  |
| 28 | social justice/                                                                                                                                                                 | 10427   |
| 29 | global health/                                                                                                                                                                  | 9804    |
| 30 | human rights/                                                                                                                                                                   | 24894   |
| 31 | ((equit* or equal* or fair* or inequit* or unequal or unfair* or global*) adj3 (access* or allocat* or distribut* or deliver* or provision or supply or supplies)).ti,ab,kw,ot. | 38602   |
| 32 | (right to health* or universal health*).ti,ab,kw,ot.                                                                                                                            | 8082    |
| 33 | ((health* or health care) adj (rationing or disparities)).ti,ab,kw,ot.                                                                                                          | 16415   |
| 34 | or/18-33                                                                                                                                                                        | 670545  |
| 35 | 8 and 17 and 34                                                                                                                                                                 | 672     |
| 36 | limit 35 to (conference abstracts or embase)                                                                                                                                    | 529     |

- **Global Index Medicus, WHO** (searched [28.08.2020](#))

Advanced search in Title, abstract, subject

COVID-19 OR "COVID 19" OR COVID19 OR 2019-nCoV OR "2019 nCoV" OR SARS2 OR SARS-CoV OR "SARS CoV" OR SARS-CoV-2 OR "SARS CoV 2" OR SARS-Cov-19 OR "SARS Cov 19" OR coronavirus OR corona OR pandemic OR pandemics

AND

vaccine OR vaccines OR vaccination OR immunization OR immunisation

AND

equity OR equitable OR equal OR equally OR inequity OR inequitable OR unequal OR unequally OR unfair OR unfairly OR disparity OR disparities OR global OR globally

- **Web of Science, Clarivate Analytics** (searched [28.08.2020](#))

COVID-19 OR "COVID 19" OR COVID19 OR 2019-nCoV OR "2019 nCoV" OR SARS2 OR SARS-CoV OR "SARS CoV" OR SARS-CoV-2 OR "SARS CoV 2" OR SARS-Cov-19 OR "SARS Cov 19" OR coronavirus OR corona OR pandemic OR pandemics

AND

vaccin\* OR immuni\*

AND

equity OR equitable OR equal OR equally OR inequity OR inequitable OR unequal OR unequally OR unfair OR unfairly OR "right to health" OR "right to healthcare" OR "universal health" OR "universal healthcare" OR "healthcare rationing" OR "health care rationing" OR "healthcare disparity" OR "healthcare disparity" OR "healthcare disparities" OR "healthcare disparities"
